# Supplementary material for: A Genome-Wide RNAi Screen in Caenorhabditis elegans Identifies the Nicotinic Acetylcholine Receptor Subunit ACR-7 as an Antipsychotic Drug Target
Source: PubMed Central journal article supplement (PMC3585123; doi:10.1371/journal.pgen.1003313), 2013-02-28
Supplement: pgen.1003313.s002.pdf [file pgen.1003313.s002.pdf]

**Table S1. Strains**

| Strain Name | Genotype                                                             |
|-------------|----------------------------------------------------------------------|
| CB113       | <i>unc-17(e113) IV</i>                                               |
| CB211       | <i>lev-1(e211) IV</i>                                                |
| CB933       | <i>unc-17(e245) IV</i>                                               |
| CB1072      | <i>unc-29(e1072) I</i>                                               |
| CE1255      | <i>cep-1(ep347) I</i>                                                |
| CZ9957      | <i>gtl-2(n2618) IV</i>                                               |
| DA453       | <i>eat-2(ad453)II</i>                                                |
| DA465       | <i>eat-2(ad465)II</i>                                                |
| DA1674      | <i>acr-19(ad1674) I</i>                                              |
| EAB1        | <i>sms-1(ok2399) IV</i>                                              |
| EAB21       | N2 <i>mchEx21 [Pacr-7::GFP, rol-6(su1006)]</i>                       |
| EAB22       | N2 <i>mchEx22 [Pacr-7::GFP, rol-6(su1006)]</i>                       |
| EAB23       | N2 <i>mchEx23 [Pacr-7::GFP, rol-6(su1006)]</i>                       |
| EAB24       | N2 <i>mchEx24 [Pacr-7::GFP, rol-6(su1006)]</i>                       |
| EAB39       | <i>acr-7(tm863) II mchEx39 [Pacr-7::acr-7::GFP, Pmyo-3::DsRed2]</i>  |
| EAB40       | <i>acr-7(tm863) II mchEx40 [Pacr-7::acr-7::GFP, Pmyo-3::DsRed2]</i>  |
| EAB41       | <i>acr-7(tm863) II mchEx41 [Pacr-7::acr-7::GFP, Pmyo-3::DsRed2]</i>  |
| EAB100      | <i>age-1(hx546) II</i>                                               |
| EAB101      | <i>scla-1(tm4806) IV</i>                                             |
| EAB102      | <i>scla-1(tm4534) IV</i>                                             |
| EAB103      | <i>ins-22(ok3616) III</i>                                            |
| EAB200      | <i>acr-7(tm863) II</i>                                               |
| EAB201      | <i>acr-16(ok789) V</i>                                               |
| EAB207      | <i>acr-7(tm863) II mchEx207 [Pmyo-2::acr-7, Pmyo-3::DsRed2]</i>      |
| EAB208      | <i>acr-7(tm863) II mchEx208 [Pmyo-2::acr-7, Pmyo-3::DsRed2]</i>      |
| EAB211      | <i>acr-7(tm863) II mchEx211 [Pmyo-2::acr-7::GFP, Pmyo-3::DsRed2]</i> |
| FX863       | <i>acr-7(tm863) II</i>                                               |
| LH202       | <i>gtl-2(tm1463) IV</i>                                              |
| MT6205      | <i>cha-1(n2411) IV</i>                                               |
| NA          | <i>F22B3.8(tm4806) IV</i>                                            |
| NA          | <i>F22B3.8(tm4534) IV</i>                                            |
| NC467       | <i>acr-5(ok205) III</i>                                              |
| NG39        | <i>ina-1(gm39) III</i>                                               |
| NL4256      | <i>rrf-3(pk1426) II</i>                                              |
| PR1152      | <i>cha-1(p1152) IV</i>                                               |
| RB918       | <i>acr-16(ok789) V</i>                                               |
| RB1132      | <i>acr-14(ok1155) II</i>                                             |
| RB1142      | <i>lron-6(ok1119) I</i>                                              |
| RB1172      | <i>acr-15(ok1214) V</i>                                              |
| RB1195      | <i>acr-8(ok1240) X</i>                                               |
| RB1226      | <i>acr-18(ok1285) V</i>                                              |

| <b>Table S1. Strains</b> |                                                                            |
|--------------------------|----------------------------------------------------------------------------|
| RB1250                   | <i>acr-21(ok1314) III</i>                                                  |
| RB1263                   | <i>acr-11(ok1345) I</i>                                                    |
| RB1559                   | <i>acr-2(ok1887) X</i>                                                     |
| RB1659                   | <i>acr-3(ok2049) X</i>                                                     |
| RB1854                   | <i>sms-1(ok2399) IV</i>                                                    |
| RB2119                   | <i>acr-23(ok2804) V</i>                                                    |
| RB2250                   | <i>puf-6(ok3044) II</i>                                                    |
| RB2294                   | <i>acr-6(ok3117) I</i>                                                     |
| RB2295                   | <i>acr-10(ok3118) X</i>                                                    |
| RB2594                   | <i>ins-22(ok3616) III</i>                                                  |
| TG12                     | <i>cep-1(lg12501) I; unc-119(ed4) III; gtl1s1 [CEP-1::GFP, unc-119(+)]</i> |
| TJ1                      | <i>cep-1(gk138) I</i>                                                      |
| TJ1052                   | <i>age-1(hx546) II</i>                                                     |
| VC188                    | <i>acr-12(ok367) X</i>                                                     |
| VC649                    | <i>acr-9(ok933) X</i>                                                      |
| VC731                    | <i>unc-63(ok1075) I</i>                                                    |
| VC1408                   | <i>magi-1(gk657) IV</i>                                                    |
| XY1054                   | <i>cep-1(lg12501) I</i>                                                    |
| ZZ15                     | <i>lev-8(x15) X</i>                                                        |
