# Supplementary material for: A Genome-Wide RNAi Screen in Caenorhabditis elegans Identifies the Nicotinic Acetylcholine Receptor Subunit ACR-7 as an Antipsychotic Drug Target
Source: PLoS Genet. 2013 Feb 28;9(2):e1003313. doi: 10.1371/journal.pgen.1003313 (PMC3585123; doi:10.1371/journal.pgen.1003313)
Supplement: Table S2 — List of primers used for plasmid constructions. (PDF) [file pgen.1003313.s003.pdf]

**Table S2. Primers**

|                                   |                                           |
|-----------------------------------|-------------------------------------------|
| <i>Pacr-7::gfp</i> primers        |                                           |
| Primer Name                       | Sequence                                  |
| ACR1                              | 5'-AAAACTGCAGTTGAGCAAGTGTGGCTGTTC-3'      |
| ACR2                              | 5'-TCCCCCGGGTAATTTTCAAAATTAAAATTGTGGAA-3' |
| <i>Pacr-7::acr-7::gfp</i> primers |                                           |
| Primer Name                       | Sequence                                  |
| ACR3                              | 5'-TTTCTGCAGTTGAGCAAGTGTGGCTGTTC-3'       |
| ACR4                              | 5'-TTTGGTACCCATCCAATATTTTGATAGGTGGAA -3'  |
| <i>Pmyo-2::acr-7</i> primers      |                                           |
| Primer Name                       | Sequence                                  |
| ACR5                              | 5'-TTTTGCTAGCATGATGGTTCAATCAATTCAAAT-3'   |
| ACR6                              | 5'-TTTTGGTACCTCAATCCAATATTTTGATAGGTG-3'   |
| <i>Pmyo-2::acr-7::gfp</i> primers |                                           |
| Primer Name                       | Sequence                                  |
| ACR7                              | 5'-TTTTGTCGACATGATGGTTCAATCAATTCAA-3'     |
| ACR8                              | 5'-TTTTCGGCCGAATCCAATATTTTGATAGGTG-3'     |
